# Supplementary material
Source: HighWire-hosted journal article supplement (https://www.cmajopen.ca/highwire/filestream/80986/field_highwire_adjunct_files/1/open-2015-0103-checklist.pdf)
Supplement: open-2015-0103-checklist.pdf [file open-2015-0103-checklist.pdf]

**Table 1**Consolidated criteria for reporting qualitative studies (COREQ): 32-item checklist<sup>1</sup>

| No                                                     | Item                    | Guide questions/description                                                                                                                                                                                     |
|--------------------------------------------------------|-------------------------|-----------------------------------------------------------------------------------------------------------------------------------------------------------------------------------------------------------------|
| <b>Domain 1:<br/>Research team and<br/>reflexivity</b> |                         |                                                                                                                                                                                                                 |
| Personal<br>Characteristics                            |                         |                                                                                                                                                                                                                 |
| 1.                                                     | Interviewer/facilitator | Which author/s conducted the interview or focus group?<br>o Focus groups were conducted by paid, non-faulty facilitators.                                                                                       |
| 2.                                                     | Credentials             | What were the researcher's credentials? <i>E.g. PhD, MD</i><br>o Kiersten Pianosi BSc<br>o Cheri Bethune, MD<br>o Katrina Hurley MD, MHI                                                                        |
| 3.                                                     | Occupation              | What was their occupation at the time of the study?<br>o Kiersten Pianosi, medical student year 3<br>o Cheri Bethune, Family Physician, Professor<br>o Katrina Hurley, Emergency Physician, Assistant Professor |
| 4.                                                     | Gender                  | Was the researcher male or female?<br>o The researchers are female                                                                                                                                              |

---

<sup>1</sup>Bethune C, Hansen PA, Deacon D, Hurley K, Kirby A, Godwin M. Family medicine as a career option: how students' attitudes changed during medical school. Can Fam Physician. 2007 May;53(5):881–5, 880.

| No                             | Item                                     | Guide questions/description                                                                                                                                                                                                                                                                                                                                                                                                                                                                                                                                                                           |
|--------------------------------|------------------------------------------|-------------------------------------------------------------------------------------------------------------------------------------------------------------------------------------------------------------------------------------------------------------------------------------------------------------------------------------------------------------------------------------------------------------------------------------------------------------------------------------------------------------------------------------------------------------------------------------------------------|
| 5.                             | Experience and training                  | <p>What experience or training did the researcher have?</p> <ul style="list-style-type: none"> <li>○ Kiersten Pianosi is a medical student with one prior publication using a mixed-methods approach; informal training on qualitative analysis and grounded theory was provided by the principal investigator prior to initiating data analysis for this study.</li> <li>○ Cheri Bethune is a family physician with multiple publications.</li> <li>○ Katrina Hurley has an MHI. She has one publication and a masters thesis that use qualitative methods, specifically grounded theory.</li> </ul> |
| Relationship with participants |                                          |                                                                                                                                                                                                                                                                                                                                                                                                                                                                                                                                                                                                       |
| 6.                             | Relationship established                 | <p>Was a relationship established prior to study commencement?</p> <ul style="list-style-type: none"> <li>○ The focus group transcripts were de-identified prior to analysis. In a small medical school, some familiarity between Dr. Bethune and the students could be expected - hence the need for a non-faculty facilitator and de-identified transcripts. Dr. Hurley would have known students in the cohort from 2002 but not in the 2006-2008 cohorts. K. Pianosi did not know any of the study participants.</li> </ul>                                                                       |
| 7.                             | Participant knowledge of the interviewer | <p>What did the participants know about the researcher? e.g. <i>personal goals, reasons for doing the research</i></p> <ul style="list-style-type: none"> <li>○ The participants knew that the purpose of the focus groups were to assess what factors influenced their medical specialty career choices and how their undergraduate schooling prepared them to do so.</li> <li>○ The participants did not know the focus group facilitators.</li> </ul>                                                                                                                                              |
| 8.                             | Interviewer characteristics              | <p>What characteristics were reported about the interviewer/facilitator? e.g. <i>Bias, assumptions, reasons and interests in the research topic</i></p> <ul style="list-style-type: none"> <li>○ Part of the motivation for the study was to investigate the trend away from family medicine. One of the focus group questions specifically asked students to consider reasons why students have moved away from general medicine and how prepared they felt to make career choice decisions. So students could likely infer some of the underlying motivations of the researchers.</li> </ul>        |

| No                            | Item                                  | Guide questions/description                                                                                                                                                                                                                                                                            |
|-------------------------------|---------------------------------------|--------------------------------------------------------------------------------------------------------------------------------------------------------------------------------------------------------------------------------------------------------------------------------------------------------|
| <b>Domain 2: study design</b> |                                       |                                                                                                                                                                                                                                                                                                        |
| Theoretical framework         |                                       |                                                                                                                                                                                                                                                                                                        |
| 9.                            | Methodological orientation and Theory | <p>What methodological orientation was stated to underpin the study? <i>e.g. grounded theory, discourse analysis, ethnography, phenomenology, content analysis</i></p> <p>○ Grounded theory guided the qualitative analysis</p>                                                                        |
| Participant selection         |                                       |                                                                                                                                                                                                                                                                                                        |
| 10.                           | Sampling                              | <p>How were participants selected? <i>e.g. purposive, convenience, consecutive, snowball</i></p> <p>○ Purposive sampling: medical students were approached to participate in focus groups in the final year of their medical schooling</p>                                                             |
| 11.                           | Method of approach                    | <p>How were participants approached? <i>e.g. face-to-face, telephone, mail, email</i></p> <p>○ The class was approached as a whole to describe the focus group and identify it as part of the longitudinal survey in which they had participated. Sign up sheets and consent forms were available.</p> |
| 12.                           | Sample size                           | <p>How many participants were in the study?</p> <p>○ 70 participants in 16 focus groups.</p>                                                                                                                                                                                                           |
| 13.                           | Non-participation                     | <p>How many people refused to participate or dropped out? Reasons?</p> <p>○ We didn't track non-responders or non-participants.</p>                                                                                                                                                                    |
| Setting                       |                                       |                                                                                                                                                                                                                                                                                                        |

| No              | Item                         | Guide questions/description                                                                                                                                                                                                                                                                                                                   |
|-----------------|------------------------------|-----------------------------------------------------------------------------------------------------------------------------------------------------------------------------------------------------------------------------------------------------------------------------------------------------------------------------------------------|
| 14.             | Setting of data collection   | <p>Where was the data collected? e.g. <i>home, clinic, workplace</i></p> <p>o Focus groups occurred at a classroom/conference room at Memorial University in St. John's, NL (the medical school that the participants attended)</p>                                                                                                           |
| 15.             | Presence of non-participants | <p>Was anyone else present besides the participants and researchers?</p> <p>o The participants and the non-faculty facilitator were the only individuals present at the focus groups.</p>                                                                                                                                                     |
| 16.             | Description of sample        | <p>What are the important characteristics of the sample? e.g. <i>demographic data, date</i></p> <p>o Graduating medical students at Memorial University of Newfoundland in the classes of 2002 and 2006-2008</p> <p>o Male and female participants</p>                                                                                        |
| Data collection |                              |                                                                                                                                                                                                                                                                                                                                               |
| 17.             | Interview guide              | <p>Were questions, prompts, guides provided by the authors? Was it pilot tested?</p> <p>o A semi-structured guide was used to facilitate the focus groups. The questions and prompts were informed based on factors identified in the longitudinal survey.</p> <p>o It was pilot tested with a cohort of students from a different class.</p> |
| 18.             | Repeat interviews            | <p>Were repeat interviews carried out? If yes, how many?</p> <p>o No, each participant only completed one focus group.</p>                                                                                                                                                                                                                    |
| 19.             | Audio/visual recording       | <p>Did the research use audio or visual recording to collect the data?</p> <p>o The focus groups were audio-recorded and subsequently transcribed and de-identified</p>                                                                                                                                                                       |
| 20.             | Field notes                  | <p>Were field notes made during and/or after the interview or focus group?</p> <p>o The non-faculty facilitator did not take field notes during the focus groups.</p>                                                                                                                                                                         |

| No                                     | Item                           | Guide questions/description                                                                                                                                                                                                                                                                                                                                                                                                                                                                                                           |
|----------------------------------------|--------------------------------|---------------------------------------------------------------------------------------------------------------------------------------------------------------------------------------------------------------------------------------------------------------------------------------------------------------------------------------------------------------------------------------------------------------------------------------------------------------------------------------------------------------------------------------|
| 21.                                    | Duration                       | <p>What was the duration of the interviews or focus group?</p> <p>o The focus groups were 35-90 minutes.</p>                                                                                                                                                                                                                                                                                                                                                                                                                          |
| 22.                                    | Data saturation                | <p>Was data saturation discussed?</p> <p>o The focus groups were executed as scheduled and ongoing participation was not based on iterative data analysis. No new themes were identified after focus group 3 in 2007. There were 3 subsequent focus groups so the data were saturated.</p>                                                                                                                                                                                                                                            |
| 23.                                    | Transcripts returned           | <p>Were transcripts returned to participants for comment and/or correction?</p> <p>o Participants did not receive copies of the transcribed and de-identified focus groups.</p>                                                                                                                                                                                                                                                                                                                                                       |
| <b>Domain 3: analysis and findings</b> |                                |                                                                                                                                                                                                                                                                                                                                                                                                                                                                                                                                       |
| Data analysis                          |                                |                                                                                                                                                                                                                                                                                                                                                                                                                                                                                                                                       |
| 24.                                    | Number of data coders          | <p>How many data coders coded the data?</p> <p>o Two researchers, Dr. Katrina Hurley and Kiersten Pianosi, coded the data</p>                                                                                                                                                                                                                                                                                                                                                                                                         |
| 25.                                    | Description of the coding tree | <p>Did authors provide a description of the coding tree?</p> <p>o The two researchers independently reviewed the transcripts several times and coded them based on recurring topics/themes that arose in the students' discussions; this allowed the authors to compare and contrast themes arising from different groups and explore incongruous ideas. Together, they met to ensure consistency and compare relationships amongst the themes.</p> <p>o Major, intermediate and minor themes are listed in Table 1 of the paper.</p> |
| 26.                                    | Derivation of themes           | <p>Were themes identified in advance or derived from the data?</p> <p>o Themes were derived from the data, based on recurring topics/themes in the students' discussions.</p>                                                                                                                                                                                                                                                                                                                                                         |

| No        | Item                         | Guide questions/description                                                                                                                                                                                                                                                                                                                                           |
|-----------|------------------------------|-----------------------------------------------------------------------------------------------------------------------------------------------------------------------------------------------------------------------------------------------------------------------------------------------------------------------------------------------------------------------|
| 27.       | Software                     | <p>What software, if applicable, was used to manage the data?</p> <p>○ The coding was done systematically by hand in conjunction with Excel spreadsheets to manage coding categories and track sentinel quotes.</p>                                                                                                                                                   |
| 28.       | Participant checking         | <p>Did participants provide feedback on the findings?</p> <p>○ Participants were de-identified in the transcripts and not asked to review the findings of the qualitative analysis.</p>                                                                                                                                                                               |
| Reporting |                              |                                                                                                                                                                                                                                                                                                                                                                       |
| 29.       | Quotations presented         | <p>Were participant quotations presented to illustrate the themes / findings? Was each quotation identified? e.g. <i>participant number</i></p> <p>○ Sentinel quotes were tracked using Excel spreadsheets and used to illustrate the recurring themes</p> <p>○ They were identified in the manuscript by cohort and focus group number, e.g. 2008, Focus Group 1</p> |
| 30.       | Data and findings consistent | <p>Was there consistency between the data presented and the findings?</p> <p>○ There was consistency between the data and the 20 recurring themes identified</p>                                                                                                                                                                                                      |
| 31.       | Clarity of major themes      | <p>Were major themes clearly presented in the findings?</p> <p>○ The major themes were identified separately in the results section using a table of sentinel quotes</p>                                                                                                                                                                                              |
| 32.       | Clarity of minor themes      | <p>Is there a description of diverse cases or discussion of minor themes?</p> <p>○ Minor themes were also identified in the results section, and were classified as those topics/themes that recurred but <i>not</i> consistently.</p> <p>○ Intermediate themes were those that occurred consistently but not as frequently as the major themes.</p>                  |
